# Supplementary material for: The oriented growth of tungsten oxide in ordered mesoporous carbon and their electrochemical performance
Source: Royal Society of Chemistry journal article supplement (doi:10.1039/c4nr00396a), 2014-01-01
Supplement: c4nr00396a1.pdf [file c4nr00396a1.pdf]

## Electronic Supplementary Information

### **The oriented growth of tungsten oxide in ordered mesoporous carbon and their electrochemistry performance**

**Tao Wang,<sup>a</sup> Jing Tang,<sup>b</sup> Xiaoli Fan,<sup>a</sup> Jianhua Zhou,<sup>c</sup> Hairong Xue,<sup>a</sup> Hu Guo,<sup>a</sup>  
and Jianping He<sup>\*a</sup>**

<sup>a</sup> College of Material Science and Technology, Nanjing University of Aeronautics and  
Astronautics, Nanjing 210016, China

<sup>b</sup> Department of Nanoscience and Nanoengineering, Faculty of Science and  
Engineering, Waseda University, 3-4-1 Okubo, Shinjuku, Tokyo 169-8555, Japan

<sup>c</sup> China Key Laboratory of Renewable Energy and Gas Hydrate, Guangzhou Institute  
of Energy Conversion, Chinese Academy of Sciences, Guangzhou 510640, China

\*Address correspondence to [jianph@nuaa.edu.cn](mailto:jianph@nuaa.edu.cn)

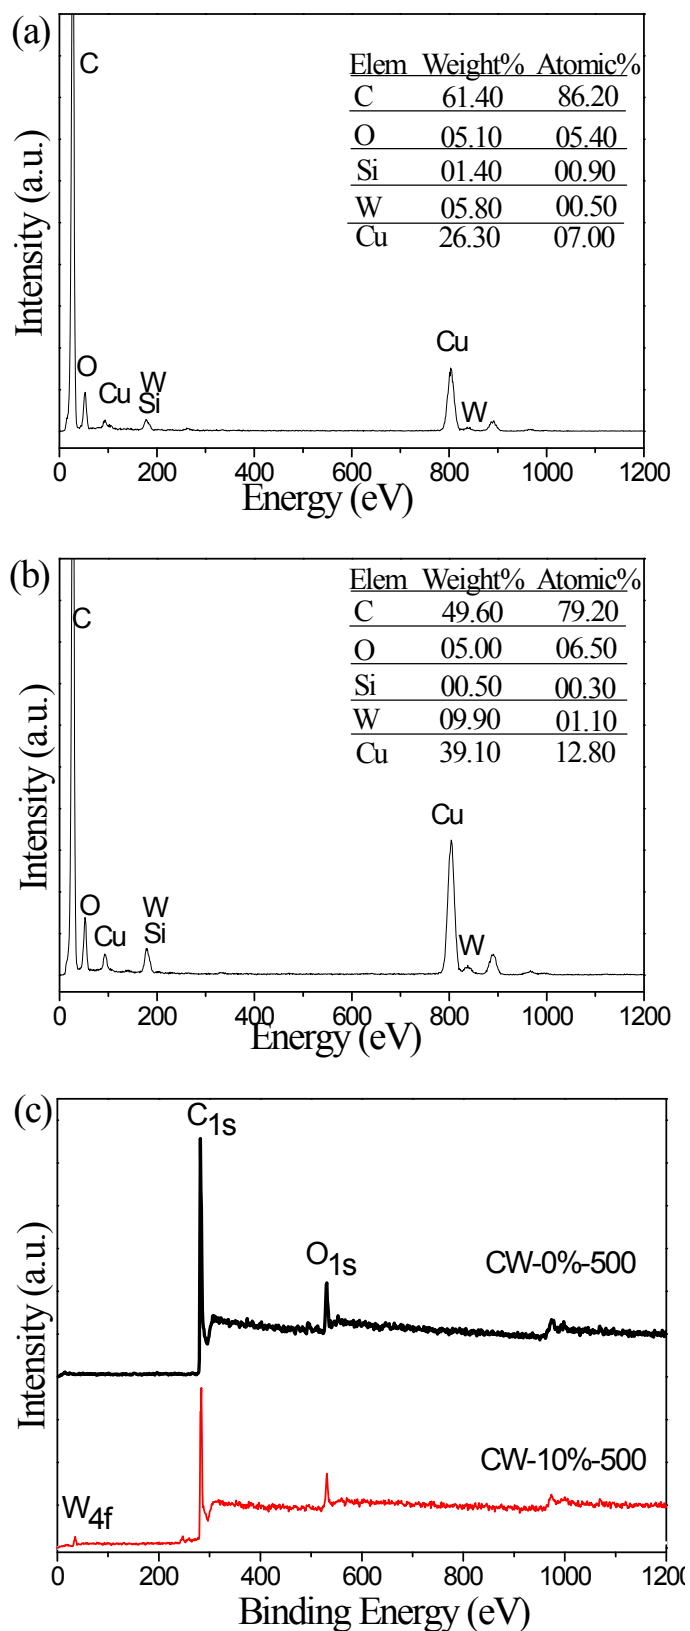

**Fig. S1** EDS of (a) CW-10%-500, (b) CW-20%-500, and (c) XPS spectrum of CW-0%-500 and CW-10%-500

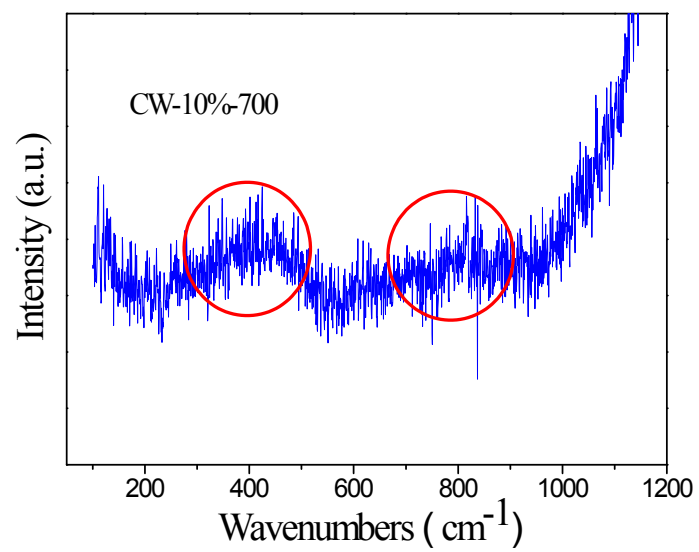

**Fig. S2** Raman spectra of ordered mesoporous C-WO<sub>3</sub>-10%-700 films from 100-1200 cm<sup>-1</sup>.

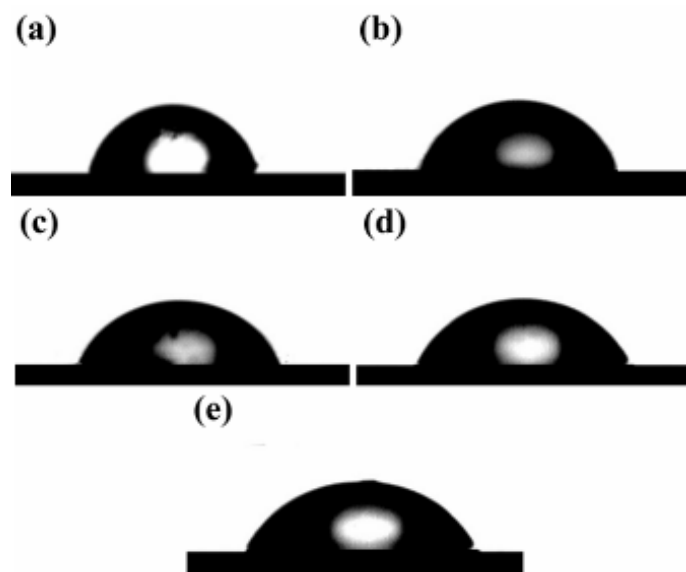

**Fig. S3.** Macroscopic low-magnification photomicrographs of the static contact angle of ordered mesoporous C-WO<sub>3</sub> films: (a) CW-0%-500, (b) CW-2.5%-500, (c) CW-5%-500, (d) CW-10%-500, (e) CW-20%-500.

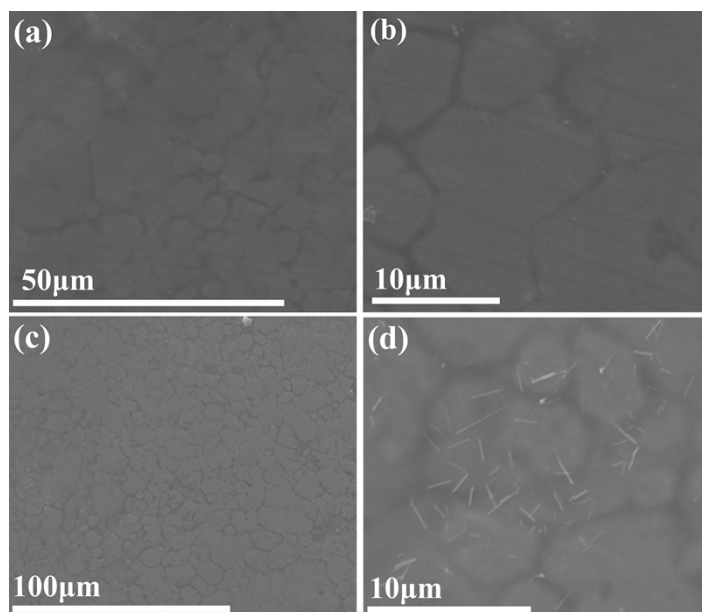

**Fig. S4.** SEM images of ordered mesoporous C-WO<sub>3</sub> films: (a,b) CW-10%-500, (c,d) CW-20%-500

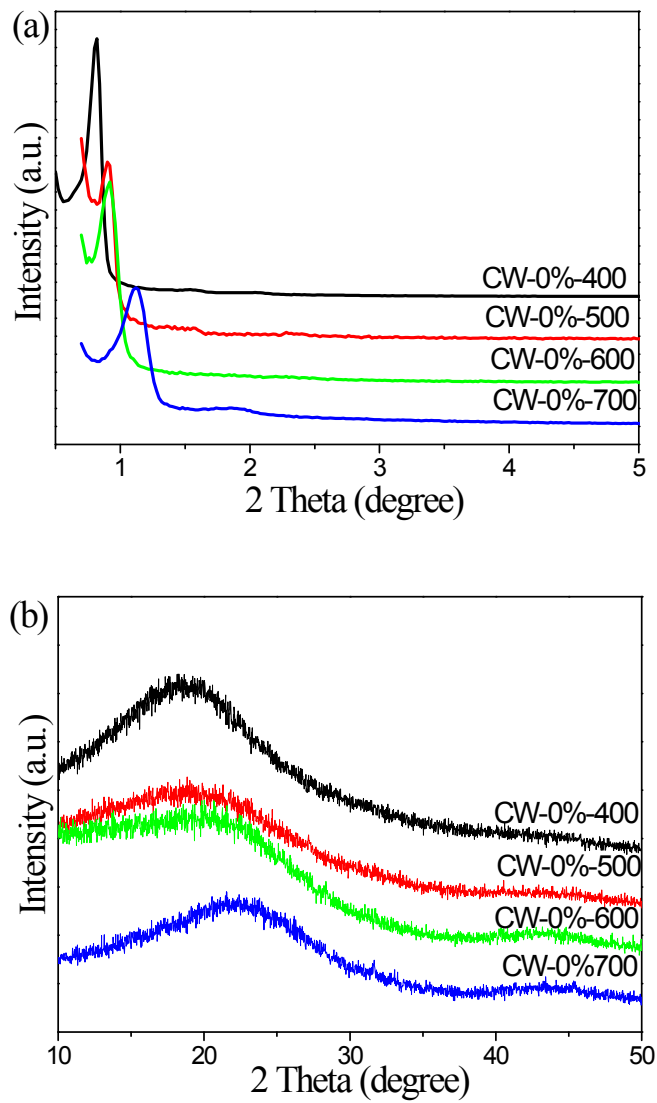

**Fig. S5.** (a) Small-angle XRD and (b) Wide-angle XRD patterns of CW-0%-y films, y represents the calcination temperature.

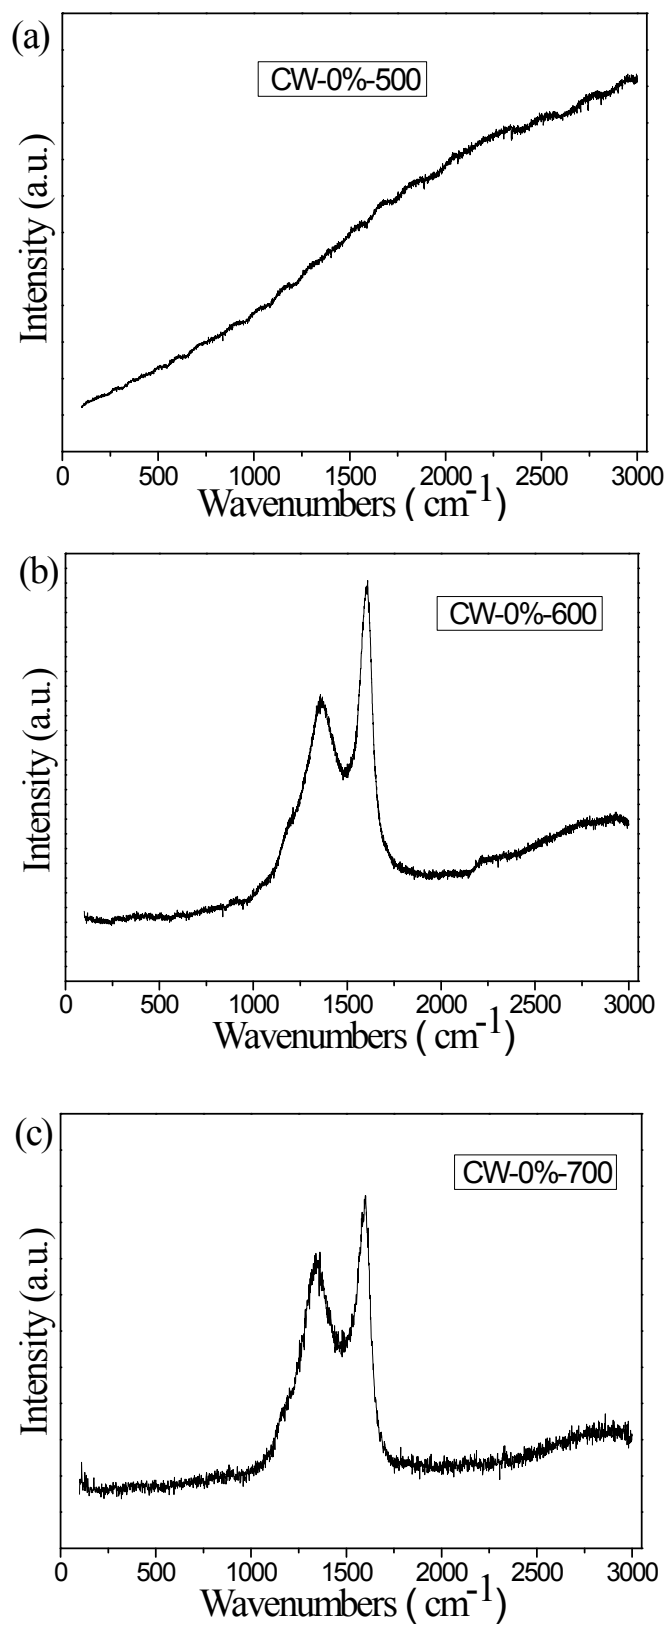

**Fig. S6.** Raman spectra of CW-0%-y films.

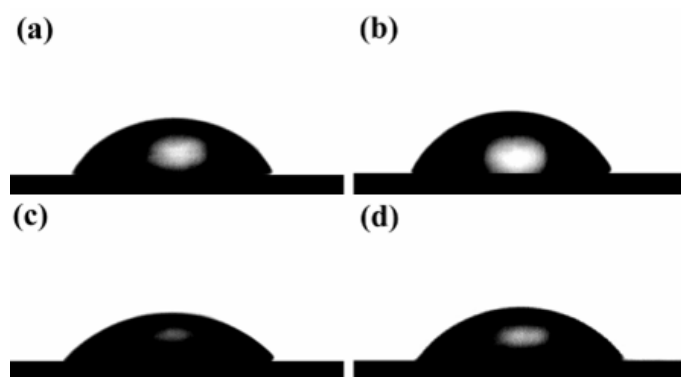

**Fig. S7.** Macroscopic low-magnification photomicrographs of the static contact angle of ordered mesoporous C-WO<sub>3</sub> films: (a) CW-10%-400, (b) CW-10%-500, (c) CW-10%-600, and (d) CW-10%-700.

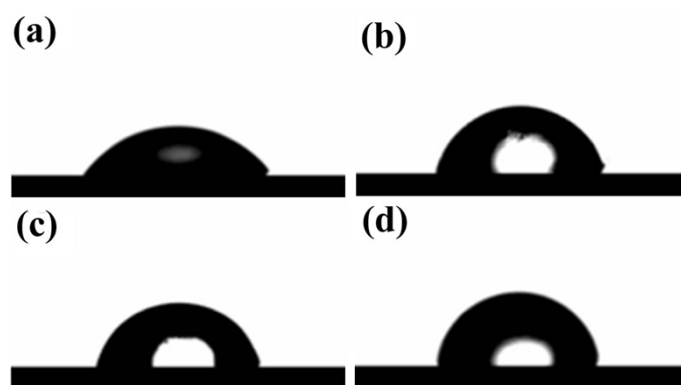

**Fig. S8.** Macroscopic low-magnification photomicrographs of the static contact angle of ordered mesoporous carbon films: (a) CW-0%-400, (b) CW-0%-500, (c) CW-0%-600, and (d) CW-0%-700.

**Table S1.** The values of contact angles with water, electrical conductivity and  $I_D/I_G$  for CW-0%-y and CW-10%-y films.

| Sample     | Contact angle (°) | Surface energy (N m <sup>-2</sup> ) | $G$ (S m <sup>-1</sup> ) | $I_D/I_G$ |
|------------|-------------------|-------------------------------------|--------------------------|-----------|
| CW-0%-400  | 54                | 46.0                                | $6.62 \times 10^{-4}$    | -         |
| CW-0%-500  | 71                | 32.0                                | 0.0043                   | -         |
| CW-0%-600  | 75                | 29.0                                | 0.252                    | 0.90      |
| CW-0%-700  | 81                | 24.7                                | 0.741                    | 0.86      |
| CW-10%-400 | 58                | 42.9                                | 0.0093                   | -         |
| CW-10%-500 | 62                | 39.5                                | 0.079                    | 1.84      |
| CW-10%-600 | 49                | 50.0                                | 2.3                      | 0.87      |
| CW-10%-700 | 53                | 46.4                                | 6.7                      | 0.81      |



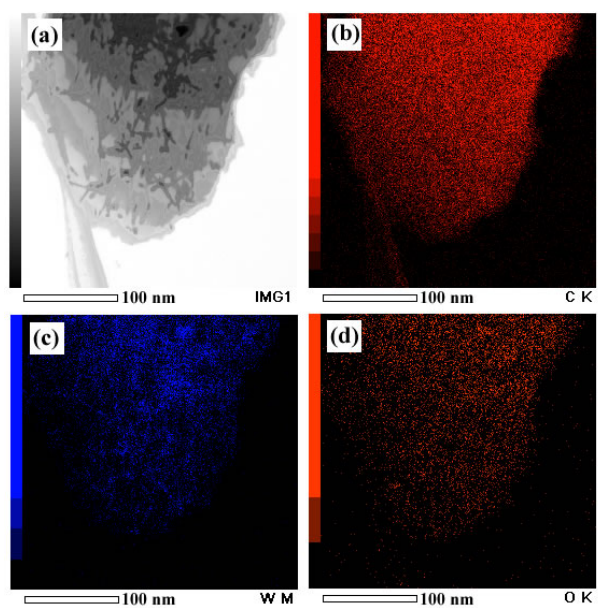

**Fig. S9.** STEM-mapping images of CW-2.5%-600: (a) STEM image, (b) C, (c) V and (d) O.

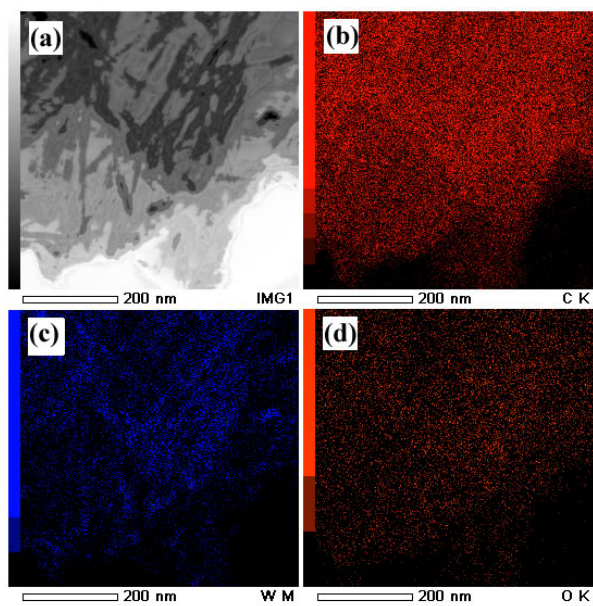

**Fig. S10.** STEM-mapping images of CW-10%-600: (a) STEM image, (b) C, (c) W and (d) O.

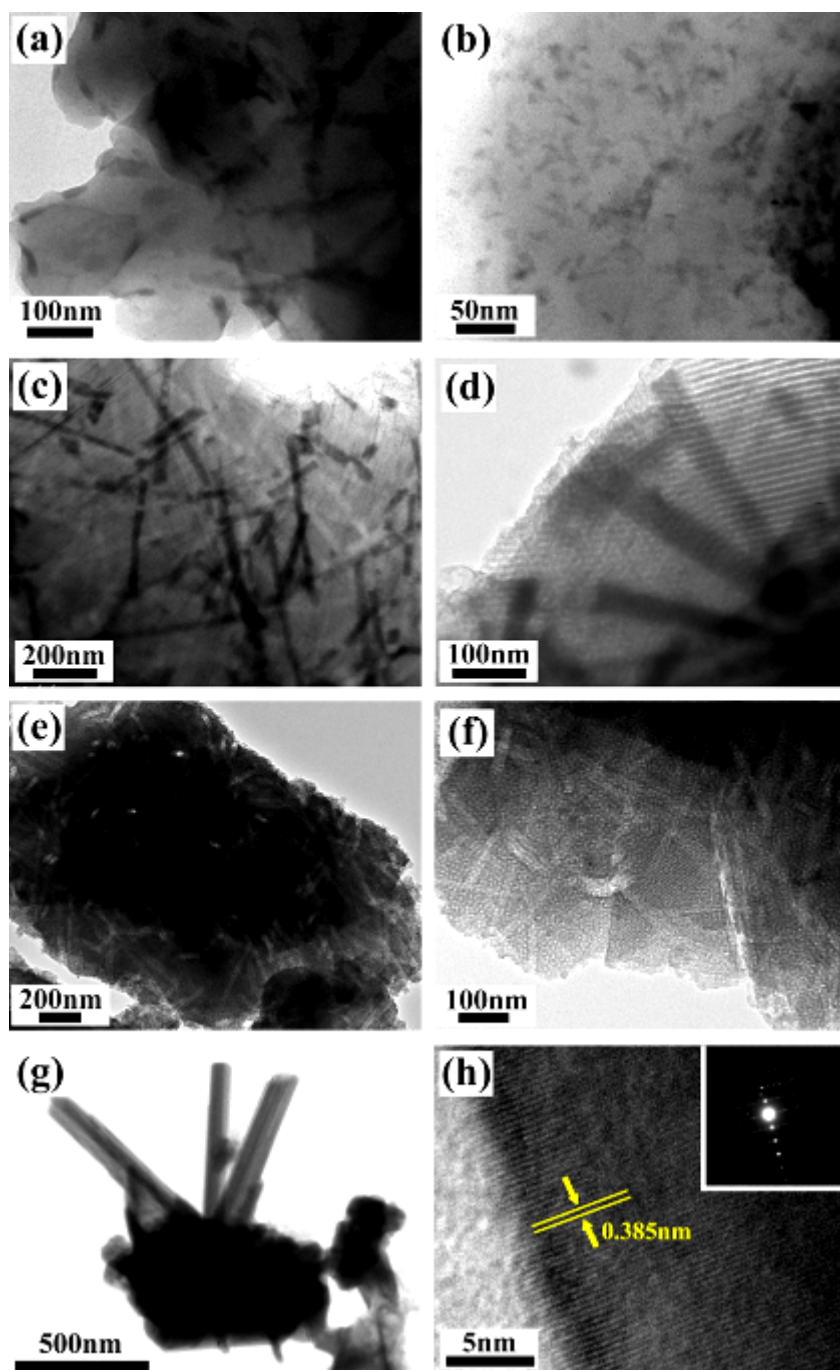

**Fig. S11.** TEM images of samples: (a,b) CW-10%-100, (c,d) CW-10%-600, (e,f) CW-C and (g,h) CW-W.

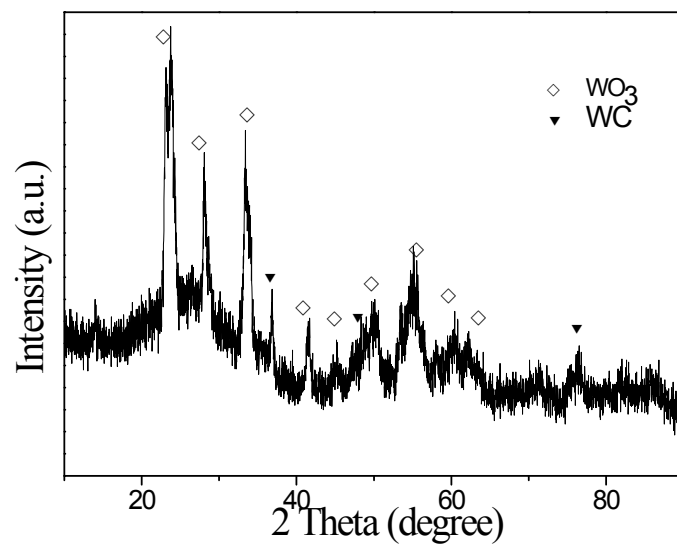

**Fig. S12.** Wide-angle XRD patterns of CW-W

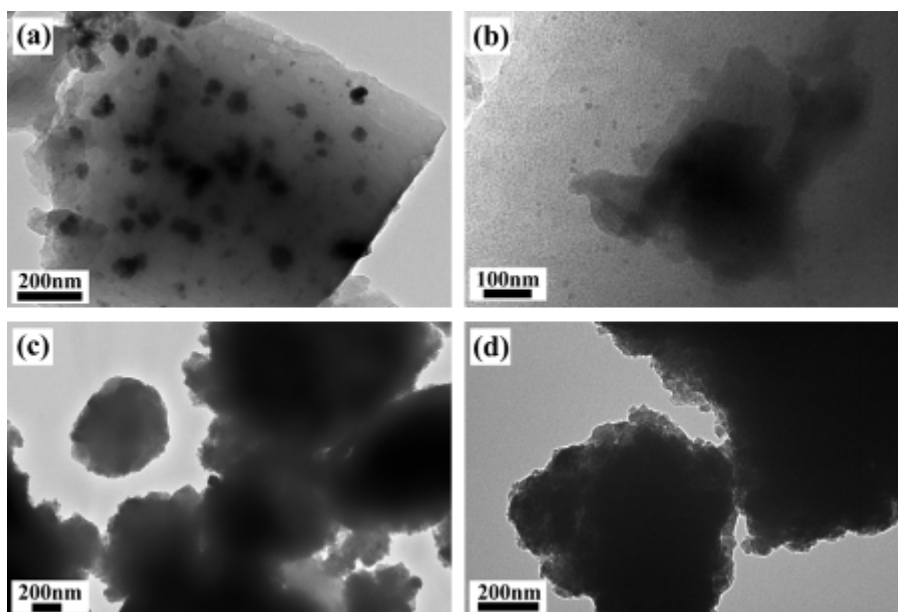

**Fig. S13.** TEM images of (a,b) R1 and (c,d) R2

**Table S2.** The corrosion current density ( $i_{corr}$ ) and the corrosion potential ( $E_{corr}$ ) values for ordered mesoporous C-WO<sub>3</sub> films in 0.5 M H<sub>2</sub>SO<sub>4</sub>.

| Sample      | $E_{corr}$ (mV)(SCE) | $i_{corr}$ ( $\mu\text{A cm}^{-2}$ ) |
|-------------|----------------------|--------------------------------------|
| CW-0%-500   | 91                   | 0.464                                |
| CW-2.5%-500 | 226                  | 0.973                                |
| CW-5%-500   | 236                  | 0.519                                |
| CW-10%-500  | 201                  | 0.0559                               |
| CW-20%-500  | 168                  | 4.570                                |

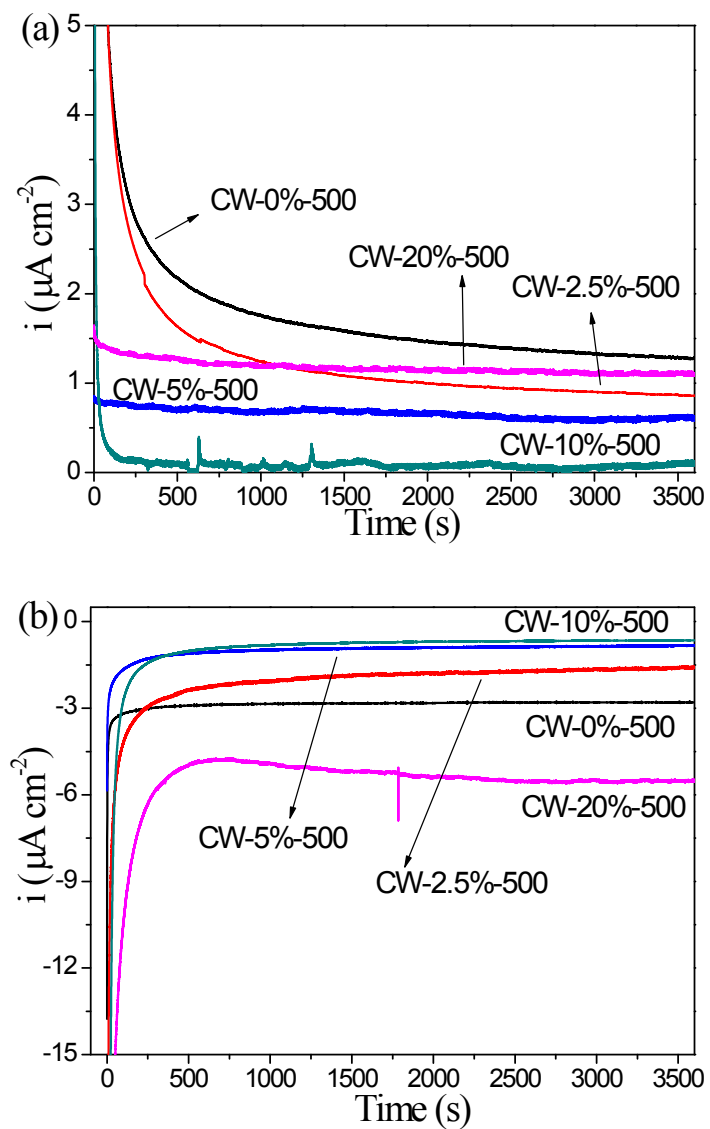

**Fig. S14.** Potentiostatic polarization curves of ordered mesoporous C-WO<sub>3</sub> films: at 600 mV (SCE) (a) and -100 mV (SCE) (b) in 0.5 mol L<sup>-1</sup> H<sub>2</sub>SO<sub>4</sub> solution.

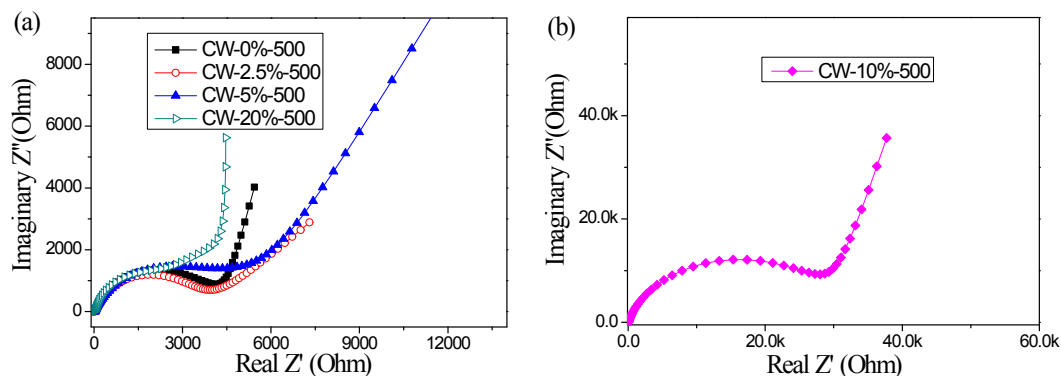

**Fig. S15.** Electrochemical impedance spectras of ordered mesoporous C-WO<sub>3</sub> films in 0.5 mol L<sup>-1</sup> H<sub>2</sub>SO<sub>4</sub> solution.

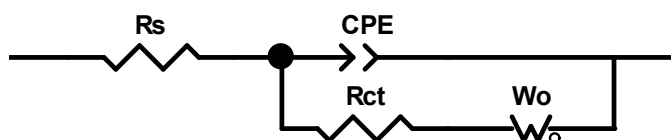

**Fig. S16.** Equivalent circuit representing the corrosion of ordered mesoporous C-WO<sub>3</sub> films in 0.5 mol L<sup>-1</sup> H<sub>2</sub>SO<sub>4</sub> solution.

Note:  $R_s$  is the solution resistance,  $R_{ct}$  is the charge-transfer resistance, the constant phase element (CPE) is accounted for the adsorptive double-layer capacitance of non-homogeneity interface,  $W_0$  is the diffusion impedance and  $W_0$ -T is the Warburg coefficient.

**Table S3.** Fitted results of electrochemical impedance spectras.

| Sample      | $R_s$ ( $\Omega$ cm <sup>2</sup> ) | CPE ( $\mu$ F cm <sup>-2</sup> ) | $R_{ct}$ ( $\Omega$ cm <sup>2</sup> ) | $W_0$ -T |
|-------------|------------------------------------|----------------------------------|---------------------------------------|----------|
| CW-0%-500   | 21.2                               | 130                              | 3802                                  | 65.8     |
| CW-2.5%-500 | 23.1                               | 22.7                             | 2863                                  | 70.5     |
| CW-5%-500   | 25.1                               | 43.2                             | 3574                                  | 61.5     |
| CW-10%-500  | 24.7                               | 57.4                             | 29372                                 | 15.1     |
| CW-20%-500  | 21.8                               | 50.2                             | 2517                                  | 200.1    |



**Table S4.** The corrosion current density ( $i_{corr}$ ) and the corrosion potential ( $E_{corr}$ ) values for CW-0%-y and CW-10%-y films in 0.5 M H<sub>2</sub>SO<sub>4</sub>.

| Sample     | $E_{corr}$ (mV)(SCE) | $i_{corr}$ ( $\mu\text{A cm}^{-2}$ ) |
|------------|----------------------|--------------------------------------|
| CW-0%-400  | -91                  | 0.664                                |
| CW-0%-500  | 91                   | 0.464                                |
| CW-0%-600  | 7                    | 2.13                                 |
| CW-0%-700  | -198                 | 4.30                                 |
| CW-10%-400 | 204                  | 1.15                                 |
| CW-10%-500 | 201                  | 0.0559                               |
| CW-10%-600 | 217                  | 0.833                                |
| CW-10%-700 | 161                  | 2.53                                 |
